# Supplementary material for: Clonal Analysis of the T-Cell Response to In Vivo Expressed Mycobacterium tuberculosis Protein Rv2034, Using a CD154 Expression Based T-Cell Cloning Method
Source: PubMed Central journal article supplement (PMC4048274; doi:10.1371/journal.pone.0099203), 2014-06-06

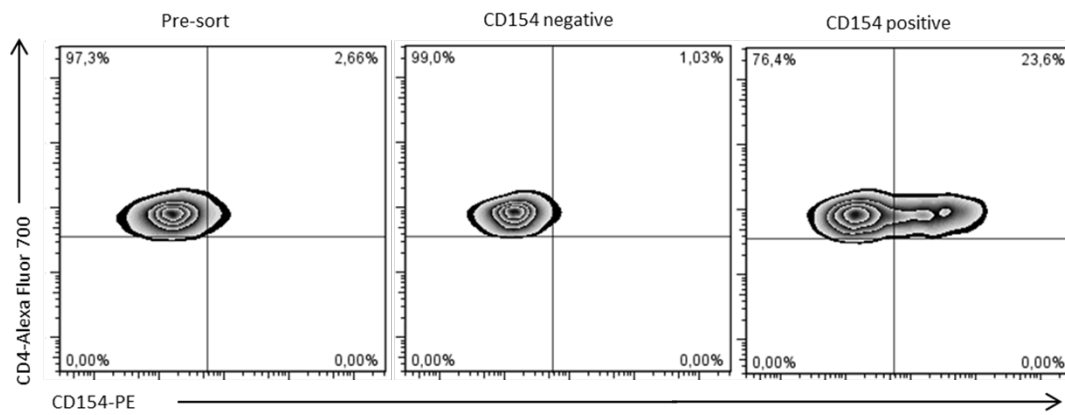

Supplement: pone.0099203.s001.pdf [file pone.0099203.s001.pdf]
