# Supplementary material for: Clonal Analysis of the T-Cell Response to In Vivo Expressed Mycobacterium tuberculosis Protein Rv2034, Using a CD154 Expression Based T-Cell Cloning Method
Source: PubMed Central journal article supplement (PMC4048274; doi:10.1371/journal.pone.0099203), 2014-06-06
Supplement: pone.0099203.s002.pdf [file pone.0099203.s002.pdf]

## Table S1

Table S1. HLA-DR and -DQ binding predictions for Rv2034 p81-100 (LRTDLDRFWTRALTGYAQLI)

| HLA-DR          | Allele molecule | SYFPEITHI <sup>a</sup> | NetMHCIIpan 2.1          | NetMHCII 2.2            | IEDB                        | IEDB                    |
|-----------------|-----------------|------------------------|--------------------------|-------------------------|-----------------------------|-------------------------|
| Sequence        | HLA-DRB1        | Score                  | Affinity nM              | Affinity nM             | arbpython (ARB) Affinity nM | SMM Affinity nM         |
| DRFWTRALTGYAQLI | 0101            | 25                     | 9.71 (SB)<br>WTRALTGYA   | 18.2 (SB)<br>TRALTGYAQ  | 21.7 (SB)<br>WTRALTGYA      | 148.0 (WB)<br>TRALTGYAQ |
| RTDLDRFWTRALTGY | 0101            | 23                     | 308.33 (WB)<br>LDRFWTRAL | 97.8 (WB)<br>LDRFWTRAL  | 422.5 (WB)<br>FWTRALTGY     | 465.0 (WB)<br>LDRFWTRAL |
| RTDLDRFWTRALTGY | 0301 (17)       | 19                     | 1562.32<br>TDLDRFWTR     | 523.4<br>TDLDRFWTR      | 397.1 (WB)<br>TDLDRFWTR     | 5181.0<br>TDLDRFWTR     |
| LRTDLDRFWTRALTG | 0301 (17)       | 2                      | 893.68<br>TDLDRFWTR      | 208.0 (WB)<br>TDLDRFWTR | 189.8 (WB)<br>LRTDLDRFW     | 1164.0<br>TDLDRFWTR     |
| RTDLDRFWTRALTGY | 0401            | 26                     | 1230.41<br>LDRFWTRAL     | 510.2<br>RFWTRALTG      | 1045.4<br>LDRFWTRAL         | 824.0<br>LDRFWTRAL      |
| DRFWTRALTGYAQLI | 0401            | 28                     | 75.81 (WB)<br>WTRALTGYA  | 216.0 (WB)<br>WTRALTGYA | 1500.4<br>WTRALTGYA         | 1294.0<br>TRALTGYAQ     |
| DLDRFWTRALTGYAQ | 0401            | 0                      | 254.70 (WB)<br>WTRALTGYA | 208.7 (WB)<br>FWTRALTGY | 1045.4<br>LDRFWTRAL         | 1022.0<br>LDRFWTRAL     |
| RTDLDRFWTRALTGY | 0701            | 24                     | 236.64 (WB)<br>LDRFWTRAL | 181.2 (WB)<br>RFWTRALTG | 129.0 (WB)<br>LDRFWTRAL     | 490.0 (WB)<br>LDRFWTRAL |
| DRFWTRALTGYAQLI | 0701            | 28                     | 56.19 (WB)<br>WTRALTGYA  | 221.4 (WB)<br>RFWTRALTG | 1364.7<br>RFWTRALTG         | 1052.0<br>WTRALTGYA     |
| LRTDLDRFWTRALTG | 0701            | 4                      | 396.16 (WB)<br>LDRFWTRAL | 169.1 (WB)<br>RFWTRALTG | 129.0 (WB)<br>LDRFWTRAL     | 503.0<br>LDRFWTRAL      |
| DRFWTRALTGYAQLI | 0801            | ND                     | 45.80 (SB)<br>WTRALTGYA  | ND                      | ND                          | ND                      |
| DRFWTRALTGYAQLI | 0901            | ND                     | 19.99 (SB)<br>WTRALTGYA  | 21.2 (SB)<br>WTRALTGYA  | 1575.8<br>WTRALTGYA         | 176.0 (WB)<br>WTRALTGYA |
| DRFWTRALTGYAQLI | 1001            | ND                     | 36.40 (SB)<br>WTRALTGYA  | ND                      | ND                          | ND                      |
| DRFWTRALTGYAQLI | 1101            | 18                     | 47.00 (SB)<br>WTRALTGYA  | 73.9 (WB)<br>WTRALTGYA  | 506.2<br>WTRALTGYA          | 793.0<br>WTRALTGYA      |
| DLDRFWTRALTGYAQ | 1101            | 7                      | 118.48 (WB)<br>WTRALTGYA | 44.3 (SB)<br>DRFWTRALT  | 506.2<br>WTRALTGYA          | 542.0<br>LDRFWTRAL      |
| TDLDRFWTRALTGYA | 1101            | 9                      | 176.31 (WB)<br>WTRALTGYA | 47.9 (SB)<br>DRFWTRALT  | 506.2<br>WTRALTGYA          | 264.0 (WB)<br>LDRFWTRAL |
| DRFWTRALTGYAQLI | 1201            | ND                     | 30.49 (SB)<br>WTRALTGYA  | ND                      | 24.7 (SB)<br>DRFWTRALT      | 584.0<br>FWTRALTGY      |
| TDLDRFWTRALTGYA | 1201            | ND                     | 54.33 (WB)<br>LDRFWTRAL  | ND                      | 24.7 (SB)<br>DRFWTRALT      | 598.0<br>FWTRALTGY      |
| RTDLDRFWTRALTGY | 1301            | ND                     | 896.73<br>LDRFWTRAL      | ND                      | ND                          | ND                      |
| LDRFWTRALTGYAQL | 1401            | ND                     | 518.20<br>WTRALTGYA      | ND                      | ND                          | ND                      |
| RTDLDRFWTRALTGY | 1501            | 28                     | 160.58 (WB)<br>LDRFWTRAL | 81.6 (WB)<br>LDRFWTRAL  | 260.8 (WB)<br>LDRFWTRAL     | 292.0 (WB)<br>LDRFWTRAL |
| DRFWTRALTGYAQLI | 1501            | 8                      | 144.92 (WB)<br>WTRALTGYA | 292.7 (WB)<br>WTRALTGYA | 1164.6 ALTGYAQLI            | 1208.0<br>WTRALTGYA     |
| DRFWTRALTGYAQLI | 1601            | ND                     | 88.90 (WB)<br>WTRALTGYA  | ND                      | ND                          | ND                      |

  

| HLA-DQ          | Allele molecule    | SYFPEITHI <sup>a</sup> | NetMHCIIpan 2.1 | NetMHCII 2.2            | IEDB                        | IEDB                    |
|-----------------|--------------------|------------------------|-----------------|-------------------------|-----------------------------|-------------------------|
| Sequence        | HLA-DQA1-DQB1      | Score                  | Affinity nM     | Affinity nM             | arbpython (ARB) Affinity nM | SMM Affinity nM         |
| RTDLDRFWTRALTGY | 0101-0501 (DQ1(5)) | ND                     | ND              | 3350.1<br>LDRFWTRAL     | 17544.9<br>LDRFWTRAL        | 2122.0<br>LDRFWTRAL     |
| LDRFWTRALTGYAQL | 0101-0501 (DQ1(5)) | ND                     | ND              | 3624.5<br>LDRFWTRAL     | 6495.7<br>RALTGYAQL         | 1964.0<br>LDRFWTRAL     |
| LDRFWTRALTGYAQL | 0102-0602 (DQ1(6)) | ND                     | ND              | 110.3 (WB)<br>TRALTGYAQ | 416.4 (WB)<br>TRALTGYAQ     | 863.0<br>TRALTGYAQ      |
| DRFWTRALTGYAQLI | 0301-0302 (DQ3(8)) | ND                     | ND              | 741.7<br>TRALTGYAQ      | 1508.9<br>RALTGYAQL         | 2599.0<br>TRALTGYAQ     |
| DRFWTRALTGYAQLI | 0401-0402 (DQ4)    | ND                     | ND              | 2289.2<br>ALTGYAQLI     | 8839.3<br>TRALTGYAQ         | 5501.0<br>TRALTGYAQ     |
| DRFWTRALTGYAQLI | 0501-0201 (DQ2)    | ND                     | ND              | 2258.9<br>ALTGYAQLI     | 3126.6<br>TRALTGYAQ         | 4043.0<br>RALTGYAQL     |
| DRFWTRALTGYAQLI | 0501-0301 (DQ3(7)) | ND                     | ND              | 39.8 (SB)<br>ALTGYAQLI  | 268.7 (WB)<br>RALTGYAQL     | 150.0 (WB)<br>TRALTGYAQ |

<sup>a</sup> SYFPEITHI scores  $\geq 25$  are considered positive

Affinity nM: Strong binder (SB) = between 1 and 50 nM  
Weak binder (WB) = between 50 and 500 nM

Core amino acids sequences are indicated along with Affinity nM values
