# Supplementary material for: Clonal Analysis of the T-Cell Response to In Vivo Expressed Mycobacterium tuberculosis Protein Rv2034, Using a CD154 Expression Based T-Cell Cloning Method
Source: PubMed Central journal article supplement (PMC4048274; doi:10.1371/journal.pone.0099203), 2014-06-06
Supplement: pone.0099203.s003.pdf [file pone.0099203.s003.pdf]

## Table S2

Table S2. HLA-DR and -DQ binding predictions for Rv2034 p88-107 (FWTRALTGYAQLIDSEGDDT)

| HLA-DR          | Allele molecule | SYFPEITHI | NetMHCIIpan 2.1                 | NetMHCII 2.2                   | IEDB                           | IEDB                           |
|-----------------|-----------------|-----------|---------------------------------|--------------------------------|--------------------------------|--------------------------------|
| Sequence        | HLA-DRB1        | Score     | Affinity nM                     | Affinity nM                    | arbpython (ARB) Affinity nM    | SMM Affinity nM                |
| LTGYAQLIDSEGDDT | 0101            | 18        | <b>312.24 (WB)</b><br>YAQLIDSEG | <b>461.4 (WB)</b><br>YAQLIDSEG | <b>231.3 (WB)</b><br>YAQLIDSEG | <b>253.0 (WB)</b><br>YAQLIDSEG |
| TRALTGYAQLIDSEG | 0101            | 9         | <b>181.26 (WB)</b><br>ALTGYAQLI | <b>92.6 (WB)</b><br>ALTGYAQLI  | <b>24.6 (SB)</b><br>ALTGYAQLI  | <b>160.0 (WB)</b><br>ALTGYAQLI |
| FWTRALTGYAQLIDS | 0101            | 10        | <b>19.73 (SB)</b><br>WTRALTGYA  | <b>35.8 (SB)</b><br>TRALTGYAQ  | <b>21.7 (SB)</b><br>WTRALTGYA  | <b>199.0 (WB)</b><br>TRALTGYAQ |
| TRALTGYAQLIDSEG | 0301 (17)       | 18        | 8678.79<br>ALTGYAQLI            | 8615.4<br>LTGYAQLID            | 6774.6<br>LTGYAQLID            | 12827.0<br>ALTGYAQLI           |
| WTRALTGYAQLIDSE | 0301 (17)       | 4         | 7642.93<br>ALTGYAQLI            | 7257.2<br>LTGYAQLID            | 6774.6<br>LTGYAQLID            | 12186.0<br>ALTGYAQLI           |
| ALTGYAQLIDSEGDD | 0301 (17)       | 1         | 10489.46<br>GYAQLIDSE           | 12849.8<br>LTGYAQLID           | <b>134.5 (WB)</b><br>QLIDSEGDD | 11880.0<br>ALTGYAQLI           |
| LTGYAQLIDSEGDDT | 0401            | 16        | 845.88<br>YAQLIDSEG             | <b>298.6 (WB)</b><br>YAQLIDSEG | 1206.2<br>YAQLIDSEG            | 910.0<br>YAQLIDSEG             |
| FWTRALTGYAQLIDS | 0401            | 6         | <b>235.93 (WB)</b><br>WTRALTGYA | 623.0<br>TRALTGYAQ             | 1500.4<br>WTRALTGYA            | 1752.0<br>TRALTGYAQ            |
| FWTRALTGYAQLIDS | 0701            | 16        | <b>149.85 (WB)</b><br>WTRALTGYA | 1010.6<br>ALTGYAQLI            | 1564.2<br>FWTRALTGY            | 1435.0<br>ALTGYAQLI            |
| FWTRALTGYAQLIDS | 0801            | ND        | <b>114.75 (WB)</b><br>WTRALTGYA | ND                             | ND                             | ND                             |
| FWTRALTGYAQLIDS | 0901            | ND        | <b>49.71 (SB)</b><br>WTRALTGYA  | <b>44.5 (SB)</b><br>WTRALTGYA  | 1575.8<br>WTRALTGYA            | 508.0<br>WTRALTGYA             |
| FWTRALTGYAQLIDS | 1001            | ND        | <b>90.27 (WB)</b><br>WTRALTGYA  | ND                             | ND                             | ND                             |
| LTGYAQLIDSEGDDT | 1101            | 22        | 5316.28<br>YAQLIDSEG            | 4891.0<br>YAQLIDSEG            | 10335.7<br>YAQLIDSEG           | 2749.0<br>YAQLIDSEG            |
| FWTRALTGYAQLIDS | 1101            | 0         | <b>129.36 (WB)</b><br>WTRALTGYA | <b>270.2 (WB)</b><br>TRALTGYAQ | 506.2<br>WTRALTGYA             | 1727.0<br>TRALTGYAQ            |
| WTRALTGYAQLIDSE | 1201            | ND        | <b>130.28 (WB)</b><br>WTRALTGYA | ND                             | <b>76.9 (WB)</b><br>GYAQLIDSE  | 5793.0<br>ALTGYAQLI            |
| FWTRALTGYAQLIDS | 1201            | ND        | <b>73.92 (WB)</b><br>WTRALTGYA  | ND                             | <b>226.0 (WB)</b><br>FWTRALTGY | 1436.0<br>FWTRALTGY            |
| FWTRALTGYAQLIDS | 1301            | ND        | 1301.10<br>ALTGYAQLI            | ND                             | ND                             | ND                             |
| FWTRALTGYAQLIDS | 1401            | ND        | 1119.26<br>WTRALTGYA            | ND                             | ND                             | ND                             |
| TRALTGYAQLIDSEG | 1501            | <b>26</b> | 1920.39<br>ALTGYAQLI            | 2419.7<br>ALTGYAQLI            | 1164.6<br>ALTGYAQLI            | 2869.0<br>ALTGYAQLI            |
| LTGYAQLIDSEGDDT | 1501            | 4         | 6484.58<br>YAQLIDSEG            | 7948.3<br>LTGYAQLID            | 499550.7<br>LIDSEGDDT          | 8760.0<br>LTGYAQLID            |
| FWTRALTGYAQLIDS | 1501            | 4         | <b>423.74 (WB)</b><br>WTRALTGYA | <b>404.7 (WB)</b><br>WTRALTGYA | 1164.6<br>ALTGYAQLI            | 1725.0<br>TRALTGYAQ            |
| FWTRALTGYAQLIDS | 1601            | ND        | <b>244.06 (WB)</b><br>WTRALTGYA | ND                             | ND                             | ND                             |

| HLA-DQ          | Allele molecule    | SYFPEITHI | NetMHCIIpan 2.1 | NetMHCII 2.2                   | IEDB                           | IEDB                           |
|-----------------|--------------------|-----------|-----------------|--------------------------------|--------------------------------|--------------------------------|
| Sequence        | HLA-DQA1-DQB1      | Score     | Affinity nM     | Affinity nM                    | arbpython (ARB) Affinity nM    | SMM Affinity nM                |
| WTRALTGYAQLIDSE | 0101-0501 (DQ1(5)) | ND        | ND              | 932.5<br>ALTGYAQLI             | 6495.7<br>RALTGYAQL            | 3032.0<br>LTGYAQLID            |
| FWTRALTGYAQLIDS | 0102-0602 (DQ1(6)) | ND        | ND              | <b>200.7 (WB)</b><br>TRALTGYAQ | <b>416.4 (WB)</b><br>TRALTGYAQ | 875.0<br>TRALTGYAQ             |
| WTRALTGYAQLIDSE | 0102-0602 (DQ1(6)) | ND        | ND              | <b>278.2 (WB)</b><br>TGQAQLIDS | <b>416.4 (WB)</b><br>TRALTGYAQ | 982.0<br>TGQAQLIDS             |
| WTRALTGYAQLIDSE | 0301-0302 (DQ3(8)) | ND        | ND              | 791.3<br>TRALTGYAQ             | 1508.9<br>RALTGYAQL            | 2218.0<br>ALTGYAQLI            |
| RALTGYAQLIDSEGD | 0301-0302 (DQ3(8)) | ND        | ND              | 918.5<br>GYAQLIDSE             | 1508.9<br>RALTGYAQL            | 2038.0<br>GYAQLIDSE            |
| WTRALTGYAQLIDSE | 0401-0402 (DQ4)    | ND        | ND              | 720.1<br>LTGYAQLID             | 8839.3<br>TRALTGYAQ            | 1907.0<br>LTGYAQLID            |
| TRALTGYAQLIDSEG | 0401-0402 (DQ4)    | ND        | ND              | 839.6<br>GYAQLIDSE             | 6060.8<br>YAQLIDSEG            | 1823.0<br>GYAQLIDSE            |
| LTGYAQLIDSEGDDT | 0501-0201 (DQ2)    | ND        | ND              | 576.6<br>GYAQLIDSE             | 2693.9<br>GYAQLIDSE            | <b>498.0 (WB)</b><br>GYAQLIDSE |
| WTRALTGYAQLIDSE | 0501-0201 (DQ2)    | ND        | ND              | <b>383.2 (WB)</b><br>GYAQLIDSE | 2693.9<br>GYAQLIDSE            | 1259.0<br>RALTGYAQL            |
| FWTRALTGYAQLIDS | 0501-0301 (DQ3(7)) | ND        | ND              | <b>31.6 (SB)</b><br>TGQAQLIDS  | <b>268.7 (WB)</b><br>RALTGYAQL | <b>116.0 (WB)</b><br>ALTGYAQLI |

<sup>a</sup> SYFPEITHI scores  $\geq 25$  are considered positive

Affinity nM: Strong binder (SB) = between 1 and 50 nM  
Weak binder (WB) = between 50 and 500 nM

Core amino acids sequences are indicated along with Affinity nM values
