# Supplementary material for: Clonal Analysis of the T-Cell Response to In Vivo Expressed Mycobacterium tuberculosis Protein Rv2034, Using a CD154 Expression Based T-Cell Cloning Method
Source: PubMed Central journal article supplement (PMC4048274; doi:10.1371/journal.pone.0099203), 2014-06-06
Supplement: pone.0099203.s004.pdf [file pone.0099203.s004.pdf]

## Table S3

Table S3. HLA-DR and -DQ binding predictions for Rv2034 p11-30 (WQALADGTRRAIVERLAHGP)

| HLA-DR          | Allele molecule | SYFPEITHI | NetMHCIIpan 2.1                 | NetMHCII 2.2                   | IEDB                           | IEDB                 |
|-----------------|-----------------|-----------|---------------------------------|--------------------------------|--------------------------------|----------------------|
| Sequence        | HLA-DRB1        | Score     | Affinity nM                     | Affinity nM                    | arbpython (ARB)<br>Affinity nM | SMM<br>Affinity nM   |
| WQALADGTRRAIVER | 0101            | 17        | 936.57<br>WQALADGTR             | 1338.2<br>WQALADGTR            | <b>328.2 (WB)</b><br>WQALADGTR | 1280.0<br>WQALADGTR  |
| ADGTRRAIVERLAHG | 0101            | 10        | 548.27<br>TRRAIVERL             | <b>217.2 (WB)</b><br>TRRAIVERL | <b>162.3 (WB)</b><br>TRRAIVERL | 966.0<br>TRRAIVERL   |
| DGTRRAIVERLAHGP | 0101            | 17        | 649.35<br>TRRAIVERL             | <b>358.4 (WB)</b><br>TRRAIVERL | <b>162.3 (WB)</b><br>TRRAIVERL | 704.0<br>RRAIVERLA   |
| WQALADGTRRAIVER | 0301 (17)       | 17        | <b>382.05(WB)</b><br>ALADGTRRA  | 3657.0<br>ALADGTRRA            | 778.5<br>WQALADGTR             | 1964.0<br>ALADGTRRA  |
| LADGTRRAIVERLAH | 0301 (17)       | 2         | 2573.34<br>TRRAIVERL            | 2246.2<br>TRRAIVERL            | 7041.1<br>RRAIVERLA            | 3947.0<br>TRRAIVERL  |
| WQALADGTRRAIVER | 0401            | 20        | 2619.02<br>ALADGTRRA            | 1776.5<br>ALADGTRRA            | 6144.3<br>ALADGTRRA            | 1671.0<br>ALADGTRRA  |
| QALADGTRRAIVERL | 0401            | 12        | 3992.11<br>ALADGTRRA            | 1705.9<br>ALADGTRRA            | 1899.1 TRRAIVERL               | 2629.0<br>LADGTRRAI  |
| WQALADGTRRAIVER | 0701            | 16        | 2050.02<br>LADGTRRAI            | 7737.1<br>LADGTRRAI            | 7861.3<br>LADGTRRAI            | 2323.0<br>ADGTRRAIV  |
| LADGTRRAIVERLAH | 0701            | 0         | 1160.30<br>TRRAIVERL            | 2146.9<br>TRRAIVERL            | <b>416.1 (WB)</b><br>TRRAIVERL | 1726.0<br>TRRAIVERL  |
| QALADGTRRAIVERL | 0701            | 16        | 1391.66<br>TRRAIVERL            | 1753.3<br>TRRAIVERL            | <b>416.1 (WB)</b><br>TRRAIVERL | 1222.0<br>LADGTRRAI  |
| DGTRRAIVERLAHGP | 0801            | ND        | <b>102.49 (WB)</b><br>RAIVERLAH | ND                             | ND                             | ND                   |
| LADGTRRAIVERLAH | 0901            | ND        | 942.60 TRRAIVERL                | 1257.0<br>RRAIVERLA            | 7453.7<br>TRRAIVERL            | 796.0<br>RRAIVERLA   |
| WQALADGTRRAIVER | 0901            | ND        | 1869.34<br>WQALADGTR            | 1622.3<br>LADGTRRAI            | 4085.1<br>WQALADGTR            | 2363.0<br>LADGTRRAI  |
| ADGTRRAIVERLAHG | 1001            | ND        | 1264.06<br>TRRAIVERL            | ND                             | ND                             | ND                   |
| DGTRRAIVERLAHGP | 1101            | 16        | <b>499.56 (WB)</b><br>RAIVERLAH | <b>90.7 (WB)</b><br>RAIVERLAH  | <b>437.9 (WB)</b><br>TRRAIVERL | 1172.0<br>RAIVERLAH  |
| QALADGTRRAIVERL | 1101            | 9         | 1500.09<br>LADGTRRAI            | 589.6<br>LADGTRRAI             | <b>437.9 (WB)</b><br>TRRAIVERL | 981.0<br>LADGTRRAI   |
| DGTRRAIVERLAHGP | 1201            | ND        | <b>209.21 (WB)</b><br>RAIVERLAH | ND                             | <b>233.7 (WB)</b><br>AIVERLAHG | 5680.0<br>AIVERLAHG  |
| ALADGTRRAIVERLA | 1201            | ND        | <b>450.26 (WB)</b><br>TRRAIVERL | ND                             | <b>236.4 (WB)</b><br>RRAIVERLA | 38230.0<br>ALADGTRRA |
| DGTRRAIVERLAHGP | 1301            | ND        | 1347.99<br>TRRAIVERL            | ND                             | ND                             | ND                   |
| DGTRRAIVERLAHGP | 1401            | ND        | 1333.73<br>RAIVERLAH            | ND                             | ND                             | ND                   |
| WQALADGTRRAIVER | 1501            | 14        | 3684.32<br>ALADGTRRA            | 7965.6<br>ADGTRRAIV            | 39071.2<br>LADGTRRAI           | 8956.0<br>ALADGTRRA  |
| DGTRRAIVERLAHGP | 1501            | 4         | 2064.34<br>TRRAIVERL            | 3040.1<br>AIVERLAHG            | <b>420.3 (WB)</b><br>IVERLAHGP | 2426.0<br>RRAIVERLA  |
| DGTRRAIVERLAHGP | 1601            | ND        | 1556.01<br>RRAIVERLA            | ND                             | ND                             | ND                   |

  

| HLA-DQ          | Allele molecule    | SYFPEITHI | NetMHCIIpan 2.1 | NetMHCII 2.2                   | IEDB                           | IEDB                           |
|-----------------|--------------------|-----------|-----------------|--------------------------------|--------------------------------|--------------------------------|
| Sequence        | HLA-DQA1-DQB1      | Score     | Affinity nM     | Affinity nM                    | arbpython (ARB)<br>Affinity nM | SMM<br>Affinity nM             |
| ADGTRRAIVERLAHG | 0101-0501 (DQ1(5)) | ND        | ND              | 20442.7<br>TRRAIVERL           | 39420.9<br>TRRAIVERL           | 19682.0<br>TRRAIVERL           |
| WQALADGTRRAIVER | 0101-0501 (DQ1(5)) | ND        | ND              | 30725.4<br>ADGTRRAIV           | 30620.6<br>LADGTRRAI           | 25918.0<br>WQALADGTR           |
| ADGTRRAIVERLAHG | 0102-0602 (DQ1(6)) | ND        | ND              | <b>342.7 (WB)</b><br>TRRAIVERL | 2666.1 TRRAIVERL               | 1450.0<br>RRAIVERLA            |
| WQALADGTRRAIVER | 0102-0602 (DQ1(6)) | ND        | ND              | 5621.9<br>ADGTRRAIV            | 1049.0<br>LADGTRRAI            | 3782.0<br>ADGTRRAIV            |
| LADGTRRAIVERLAH | 0301-0302 (DQ3(8)) | ND        | ND              | 1204.6<br>DGTRRAIVE            | 9616.6 RAIVERLAH               | 1551.0<br>TRRAIVERL            |
| QALADGTRRAIVERL | 0401-0402 (DQ4)    | ND        | ND              | 1364.5<br>DGTRRAIVE            | 10443.7<br>TRRAIVERL           | 2530.0<br>GTRRAIVER            |
| LADGTRRAIVERLAH | 0401-0402 (DQ4)    | ND        | ND              | 1758.0<br>DGTRRAIVE            | 10443.7<br>TRRAIVERL           | 2523.0<br>GTRRAIVER            |
| DGTRRAIVERLAHGP | 0501-0201 (DQ2)    | ND        | ND              | 1730.8<br>TRRAIVERL            | 5997.0 TRRAIVERL               | 3385.0<br>TRRAIVERL            |
| QALADGTRRAIVERL | 0501-0201 (DQ2)    | ND        | ND              | <b>484.9 (WB)</b><br>TRRAIVERL | 5997.0 TRRAIVERL               | 4564.0<br>GTRRAIVER            |
| ALADGTRRAIVERLA | 0501-0301 (DQ3(7)) | ND        | ND              | <b>143.7 (WB)</b><br>TRRAIVERL | <b>14.6 (SB)</b><br>ADGTRRAIV  | <b>255.0 (WB)</b><br>ADGTRRAIV |
| QALADGTRRAIVERL | 0501-0301 (DQ3(7)) | ND        | ND              | <b>154.4 (WB)</b><br>ADGTRRAIV | <b>14.6 (SB)</b><br>ADGTRRAIV  | <b>237.0 (WB)</b><br>ADGTRRAIV |

<sup>a</sup> SYFPEITHI scores  $\geq 25$  are considered positive

Affinity nM: Strong binder (SB) = between 1 and 50 nM  
Weak binder (WB) = between 50 and 500 nM

Core amino acids sequences are indicated along with Affinity nM values
